# Supplementary material
Source: PubMed Central journal article supplement (PMC506810)
Supplement: nar_32_13_3904__2.pdf [file nar_32_13_3904__2.pdf]

Figure legends to Supporting Fig.7

- A. Structures of the A base and its analog 2-amino purine, for ease of comparison.
- B. Structures of the G base and its analog inosine, for ease of comparison.
