# Supplementary material
Source: PubMed Central journal article supplement (PMC506810)

A

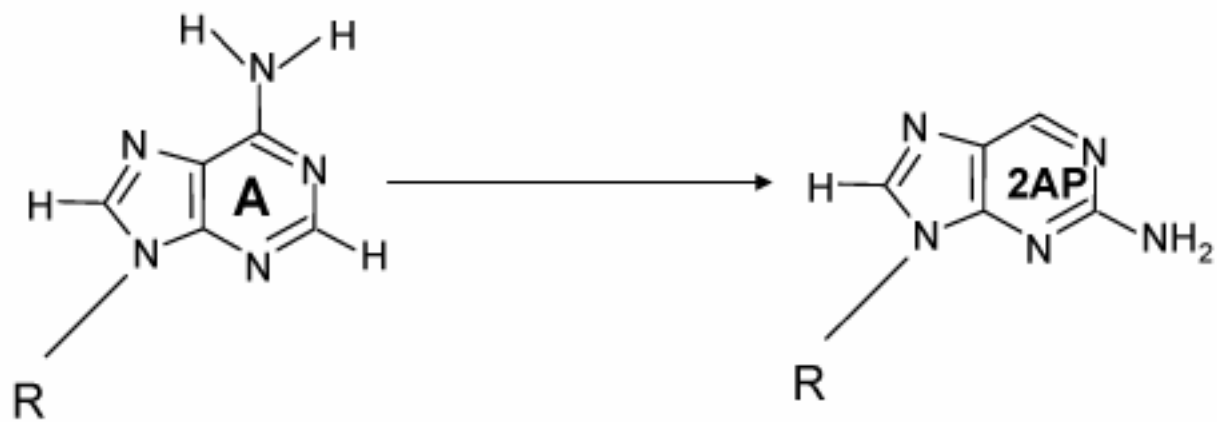

B

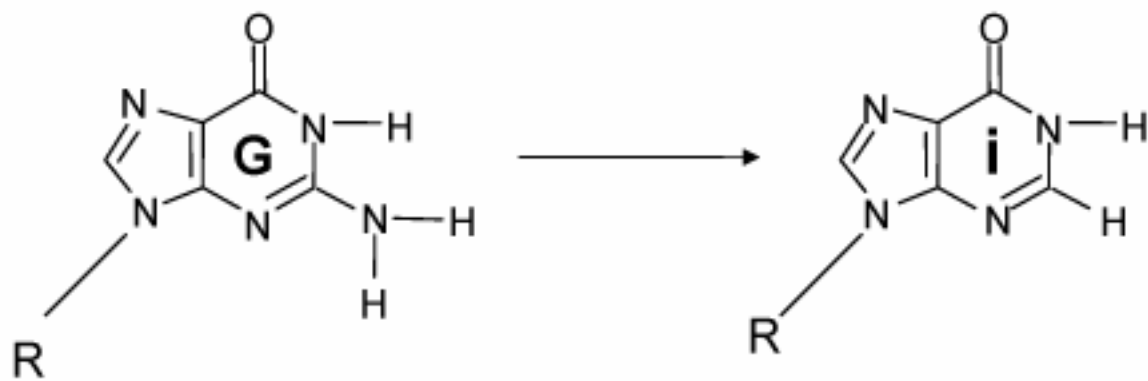

Supplement: nar_32_13_3904__1.pdf [file nar_32_13_3904__1.pdf]
